# Supplementary figures and images for: Molecular and Pathological Characterization of Classical Swine Fever Virus Genotype 2 Strains Responsible for the 2013–2018 Outbreak in Colombia
Source: MDPI journal article supplement (doi:10.3390/v15122308), 2023-11-24

Region

- Africa
- Americas
- Asia
- Europe

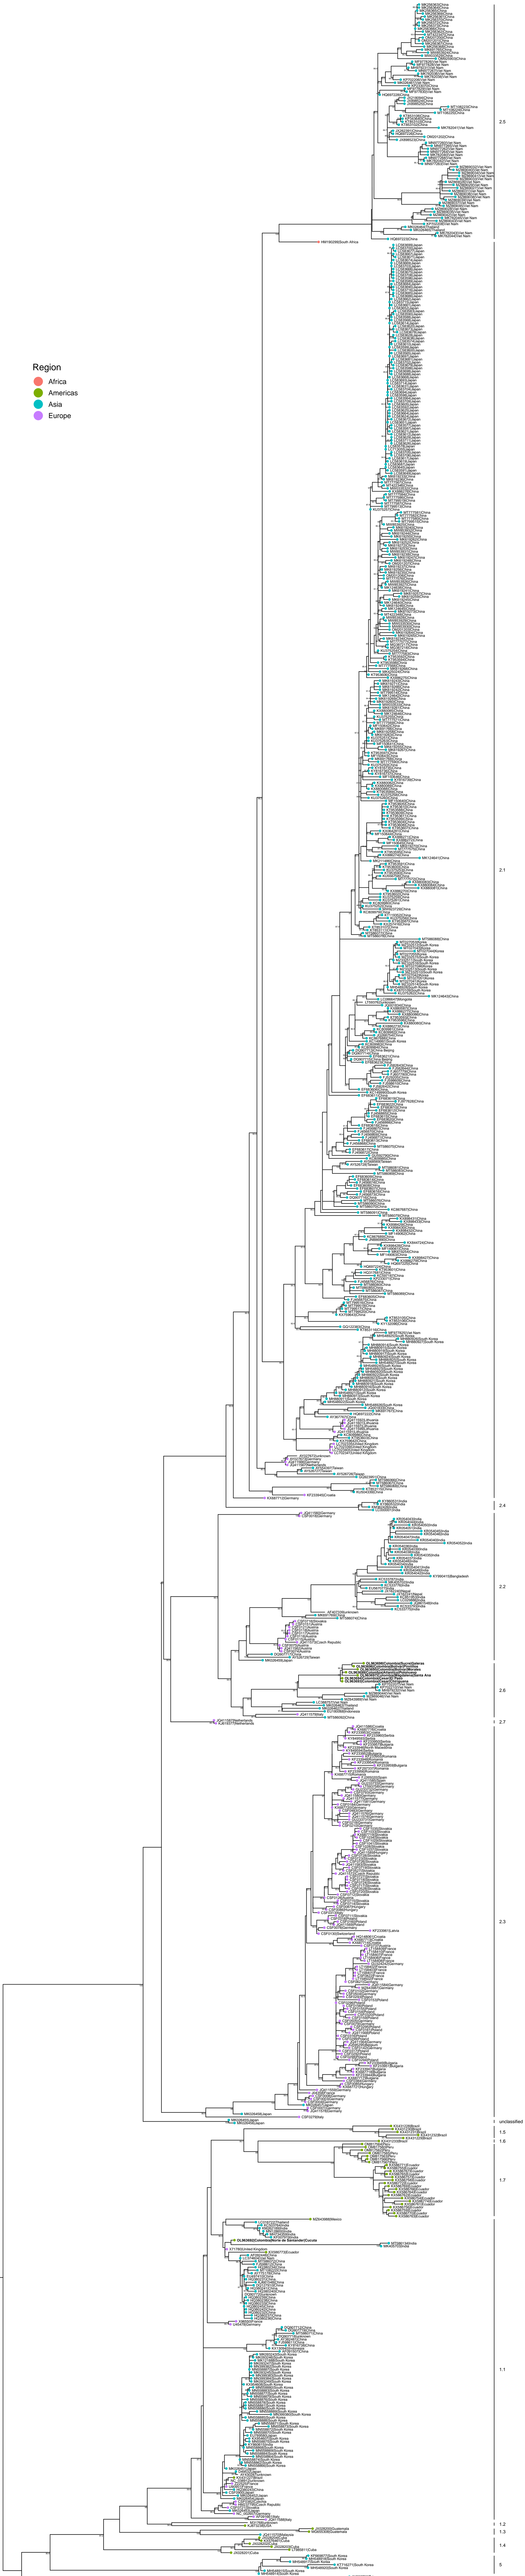

Supplement: s1 [file s1]
